# Supplementary material for: γ-Glutamylcysteine amelioratesd-gal-induced senescence in PC12 cells and miceviaactivating AMPK and SIRT1
Source: Royal Society of Chemistry journal article supplement (doi:10.1039/d2fo01246d), 2022-01-01
Supplement: d2fo01246d1.pdf [file d2fo01246d1.pdf]

Supplementary figure

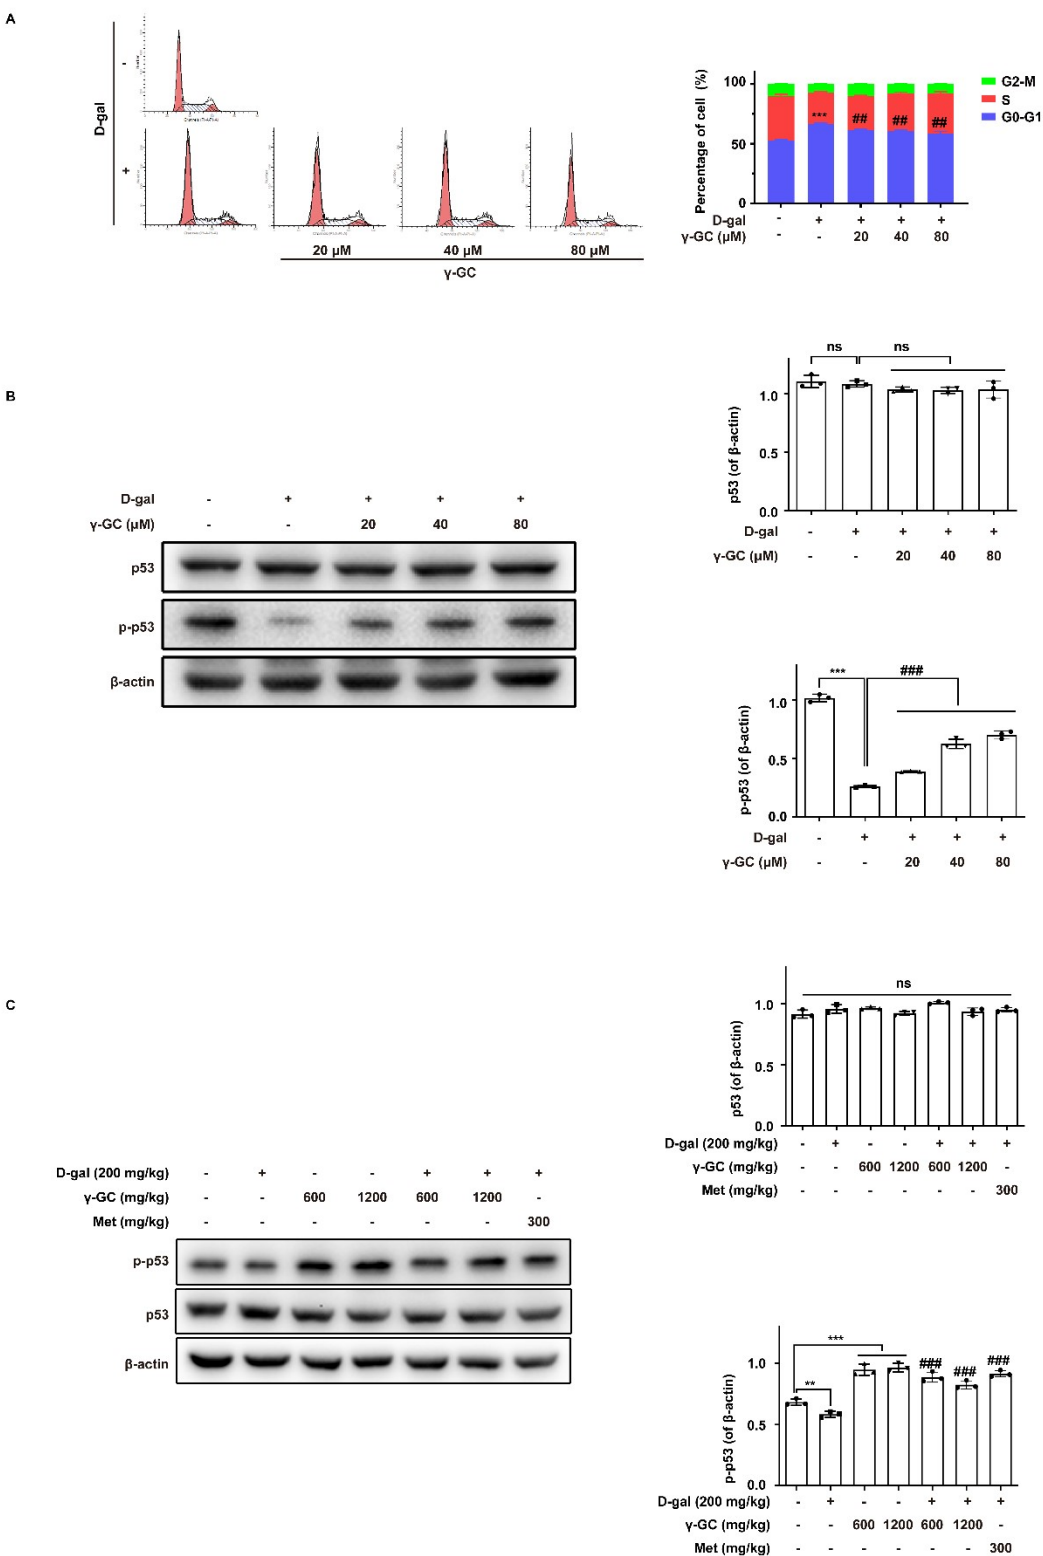

Fig. S1  $\gamma$ -GC inhibits D-gal-induced senescence in PC12 cells and aging in BALB/c mice. (A)

Images of the cell cycle in each group and percentages of cells in G0/G1, S, and G2/M phases. (B, C) Protein levels of p-p53 (S15), p53 and  $\beta$ -actin in PC12 cells and BALB/c mice by western blotting. Data are presented as mean  $\pm$  SD of three independent experiments in each group. \*\* $p < 0.01$ , \*\*\* $p < 0.001$  as compared with the control group; ### $p < 0.001$  as compared with the D-gal group; ns: no significant difference.

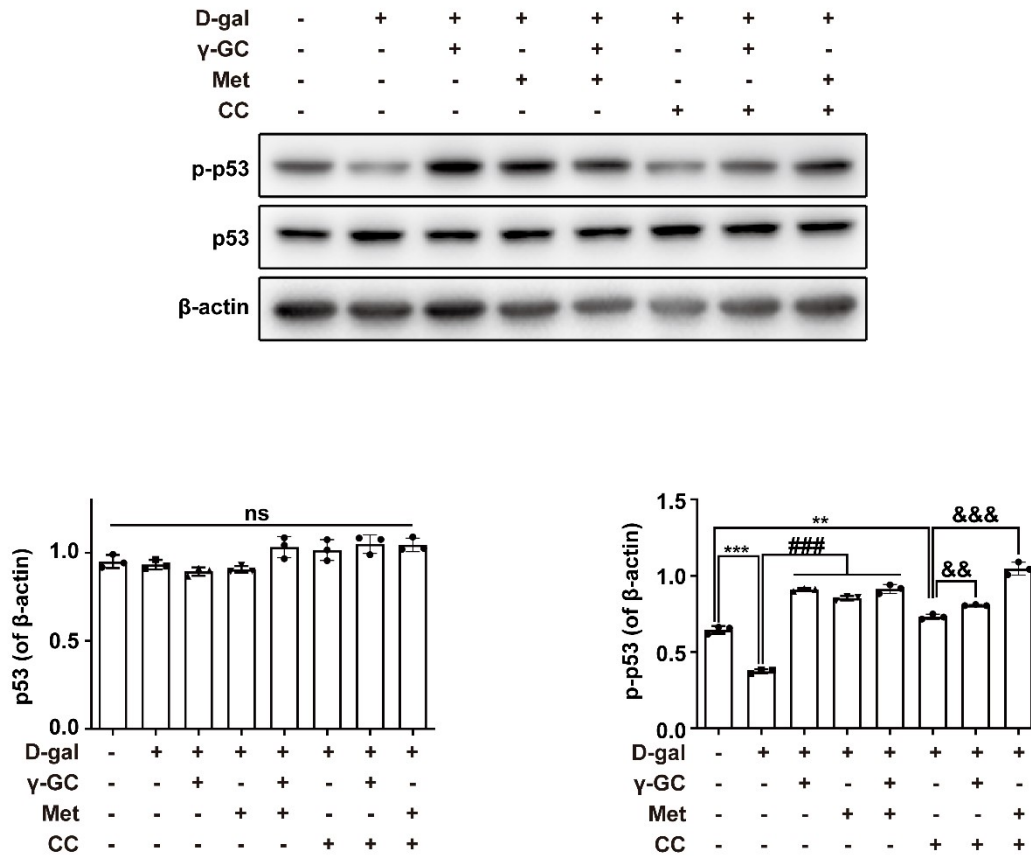

Fig. S2  $\gamma$ -GC prevents D-gal-induced PC12 cell senescence via the activation of AMPK. PC12 cells were treated with D-gal, CC (2  $\mu$ M), or D-gal + CC (2  $\mu$ M) and then incubated in a complete medium with  $\gamma$ -GC (80  $\mu$ M) or Met (80  $\mu$ M) for 48 h. Immunoblotting analysis of p53, and p-p53 (S15) levels in each group. Data are presented as mean  $\pm$  SD of three independent experiments in each group. \*\* $p < 0.01$ , \*\*\* $p < 0.001$  as compared with the control group; ### $p < 0.001$  as compared with the D-gal group; && $p < 0.01$ , &&& $p < 0.001$  as compared with the D-gal and CC combined treatment group; ns: no significant difference.

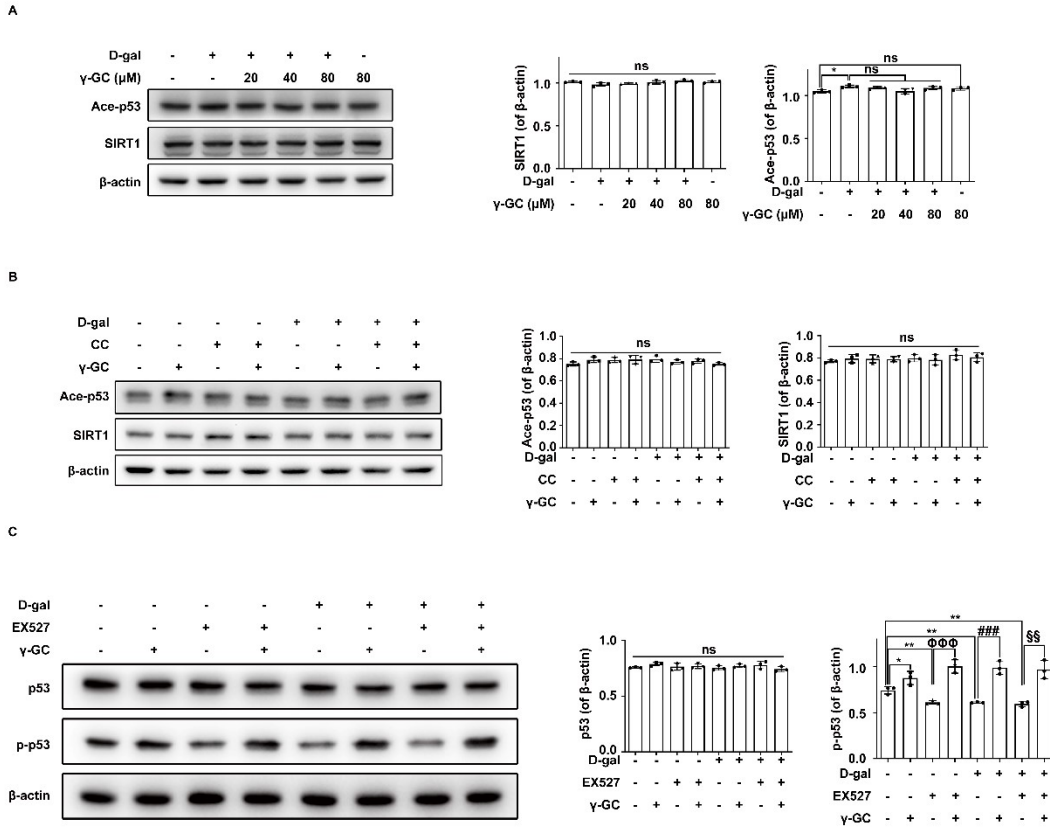

Fig. S3  $\gamma$ -GC prevents the increase of Ace-p53 in the nucleus via activating AMPK. (A) D-gal treated PC12 cells were incubated in a complete medium with  $\gamma$ -GC (20, 40, 80  $\mu$ M) for 48 h. Immunoblotting analysis the protein level of Ace-p53 and SIRT1 in whole-cell protein in each group. Data are presented as mean  $\pm$  SD of three independent experiments in each group. (B) Cells were treated with D-gal or  $\gamma$ -GC (80  $\mu$ M) in the presence or absence of CC (2  $\mu$ M); immunoblotting analysis of the protein levels of Ace-p53 in the whole-cell protein in each group. Data are presented as mean  $\pm$  SD of three independent experiments in each group. (C) Cells were treated with D-gal or  $\gamma$ -GC (80  $\mu$ M) in the presence or absence of EX527 (1  $\mu$ M); immunoblotting analysis of the protein levels of p53, p-p53 in each group. Data are presented as mean  $\pm$  SD of three independent experiments in each group. \* $p < 0.05$ , \*\* $p < 0.01$  as compared with the control group; ### $p < 0.001$  as compared with the D-gal group;  $\Phi\Phi\Phi p < 0.001$  as compared with the EX527 group; §§ $p < 0.01$  as compared with the D-gal and EX527 combined treatment group; ns: no significant difference.
